# Supplementary material for: An improved bathymetry compilation for the Bellingshausen Sea, Antarctica, to inform ice-sheet and ocean models
Source: Copernicus journal article supplement (doi:10.5194/tc-5-95-2011), 2011-02-16
Supplement: Supplementary file 1 [file tc-5-95-2011-supplement.zip]

Supplementary Figure S2

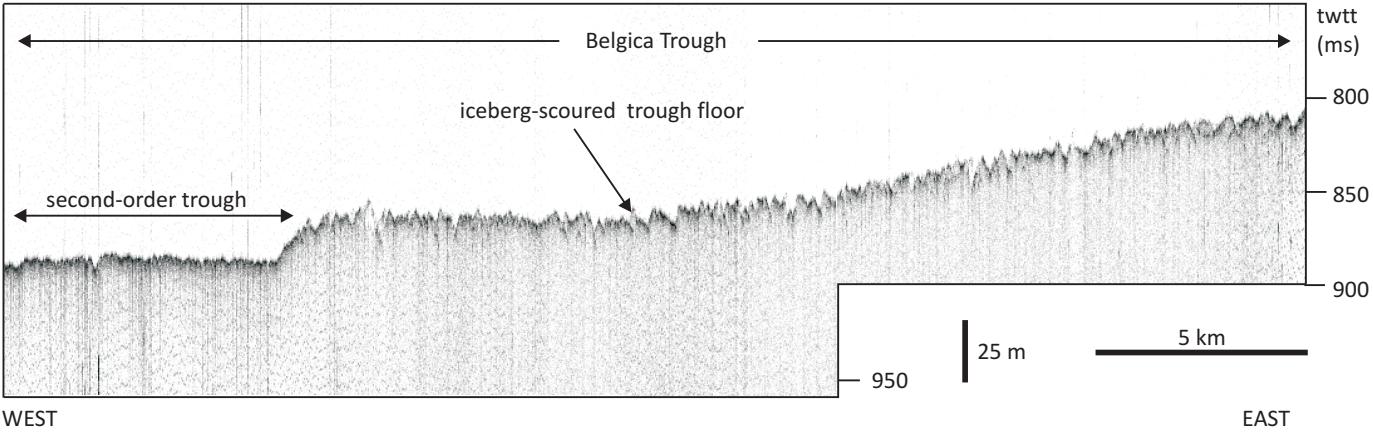

TOPAS sub-bottom acoustic profile across the second-order trough, nested within the larger Belgica Trough, on the outer Bellingshausen Sea continental shelf.
