# Supplementary material for: An improved bathymetry compilation for the Bellingshausen Sea, Antarctica, to inform ice-sheet and ocean models
Source: Copernicus journal article supplement (doi:10.5194/tc-5-95-2011), 2011-02-16
Supplement: Supplementary file 3 [file tc-5-95-2011-supplement.zip]

Archive with 26 entries (20 files):
- supplementary/Comment_reply/
- supplementary/Comment_reply/tcd-4-C1196-2010_Jamieson.pdf
- supplementary/Comment_reply/tcd-4-C1245-2010_Graham_reply.pdf
- supplementary/Figures/
- supplementary/Figures/s01.pdf
- supplementary/Figures/s02.pdf
- supplementary/Grid_v1_1/
- supplementary/Grid_v1_1/bell_1km_v1_1/
- supplementary/Grid_v1_1/bell_1km_v1_1/dblbnd.adf
- supplementary/Grid_v1_1/bell_1km_v1_1/hdr.adf
- supplementary/Grid_v1_1/bell_1km_v1_1/prj.adf
- supplementary/Grid_v1_1/bell_1km_v1_1/sta.adf
- supplementary/Grid_v1_1/bell_1km_v1_1/w001001.adf
- supplementary/Grid_v1_1/bell_1km_v1_1/w001001x.adf
- supplementary/Grid_v1_1/bell_1km_v1_1.asc
- supplementary/Grid_v1_1/bell_1km_v1_1.aux
- supplementary/Grid_v1_1/bell_1km_v1_1.nc
- supplementary/Grid_v1_1/bell_1km_v1_1.rrd
- supplementary/Grid_v1_1/info/
- supplementary/Grid_v1_1/info/arc.dir
- supplementary/Grid_v1_1/info/arc0000.dat
- supplementary/Grid_v1_1/info/arc0000.nit
- supplementary/Grid_v1_1/info/arc0001.dat
- supplementary/Grid_v1_1/info/arc0001.nit
- supplementary/README.rtf
- supplementary/
