# Supplementary material for: An improved bathymetry compilation for the Bellingshausen Sea, Antarctica, to inform ice-sheet and ocean models
Source: Copernicus journal article supplement (doi:10.5194/tc-5-95-2011), 2011-02-16
Supplement: Supplementary file 3 [file tc-5-95-2011-supplement.zip › supplementary/Grid_v1_1/bell_1km_v1_1/prj.adf]

Projection    POLAR
Datum         WGS84
Spheroid      WGS84
Units         METERS
Zunits        NO
Xshift        0.0
Yshift        0.0
Parameters    
   0  0  0.0 /* longitude of central meridian
 -90  0  0.0 /* latitude of true scale
0.0 /* false easting (meters)
0.0 /* false northing (meters)
