# Supplementary material for: An improved bathymetry compilation for the Bellingshausen Sea, Antarctica, to inform ice-sheet and ocean models
Source: Copernicus journal article supplement (doi:10.5194/tc-5-95-2011), 2011-02-16
Supplement: Supplementary file 3 [file tc-5-95-2011-supplement.zip › supplementary/Grid_v1_1/info/arc0000.dat]

../bell_1km_v1_1/dblbnd.adf                                                     
