# Supplementary material for: An improved bathymetry compilation for the Bellingshausen Sea, Antarctica, to inform ice-sheet and ocean models
Source: Copernicus journal article supplement (doi:10.5194/tc-5-95-2011), 2011-02-16
Supplement: Supplementary file 3 [file tc-5-95-2011-supplement.zip › supplementary/README.rtf]

SUPPLEMENTARY MATERIAL

(1) 'Figures' folder contains 2 supplementary figures which accompany the revised paper.


(2) 'Comment_reply' folder contains 2 PDFs of the comment and reply between AG and Stewart Jamieson, which can also be found in the interactive comments section of The Cryopshere Discussions paper


(3) 'Grid_v1_1' folder contains v. 1.1 of the Bellingshausen bathymetry grid, in 3 different formats:

- Arc formatted ASCII (*.asc)
- NetCDF (*.nc)
- ArcGIS grid (*.rrd + ancillary folders/files)

All formats are identical (1 km cell size, compiled in South Pole Stereographic projection).

AGCG 06/01/2011; alah@bas.ac.uk
